# Supplementary material
Source: PubMed Central journal article supplement (PMC9433054)
Supplement: mmc1.pdf [file mmc1.pdf]

# THE LANCET

## Public Health

### Supplementary appendix

This appendix formed part of the original submission and has been peer reviewed. We post it as supplied by the authors.

Supplement to: Chen Y-H, Riley AR, Duchowny KA, et al. COVID-19 mortality and excess mortality among working-age residents in California, USA, by occupational sector: a longitudinal cohort analysis of mortality surveillance data. *Lancet Public Health* 2022; 7: e744-53.

Figure S1: Vaccination uptake over time, by county, under the primary definition of high/low counties.

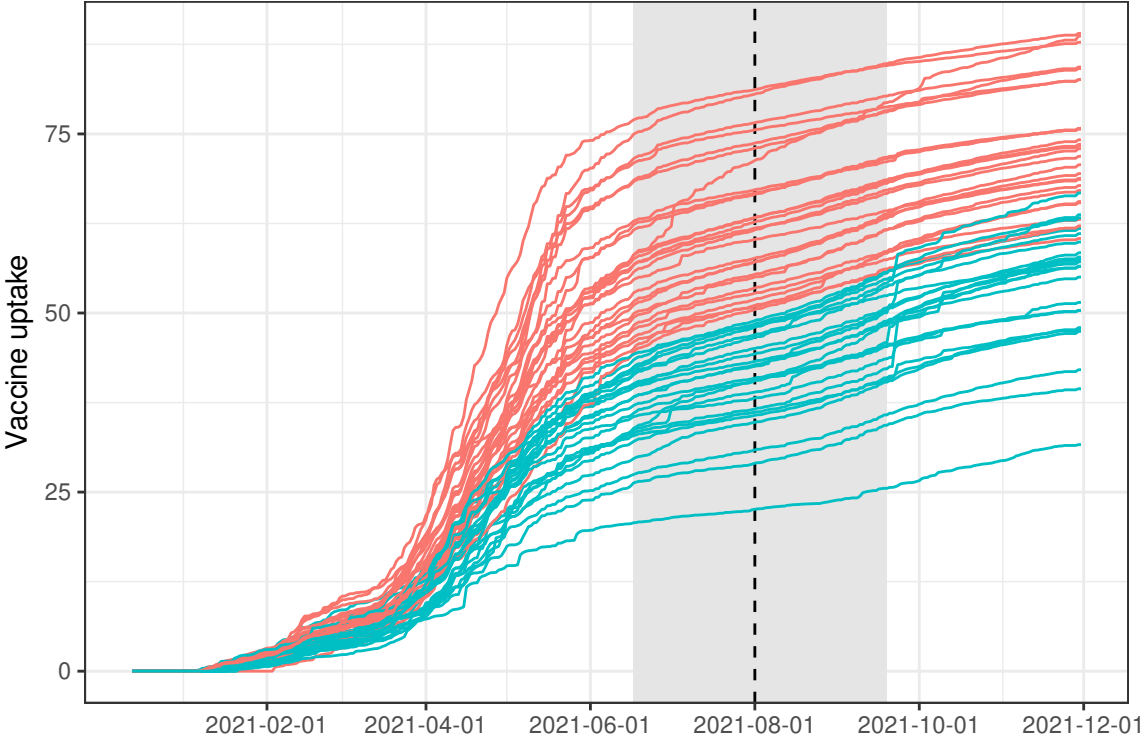

Red lines indicate high-uptake regions while blue lines indicate low-uptake regions. The gray shading indicates a period of consistency in the high/low definition.

Figure S2: Vaccination uptake over time, by county, under the alternate definition of high/low counties.

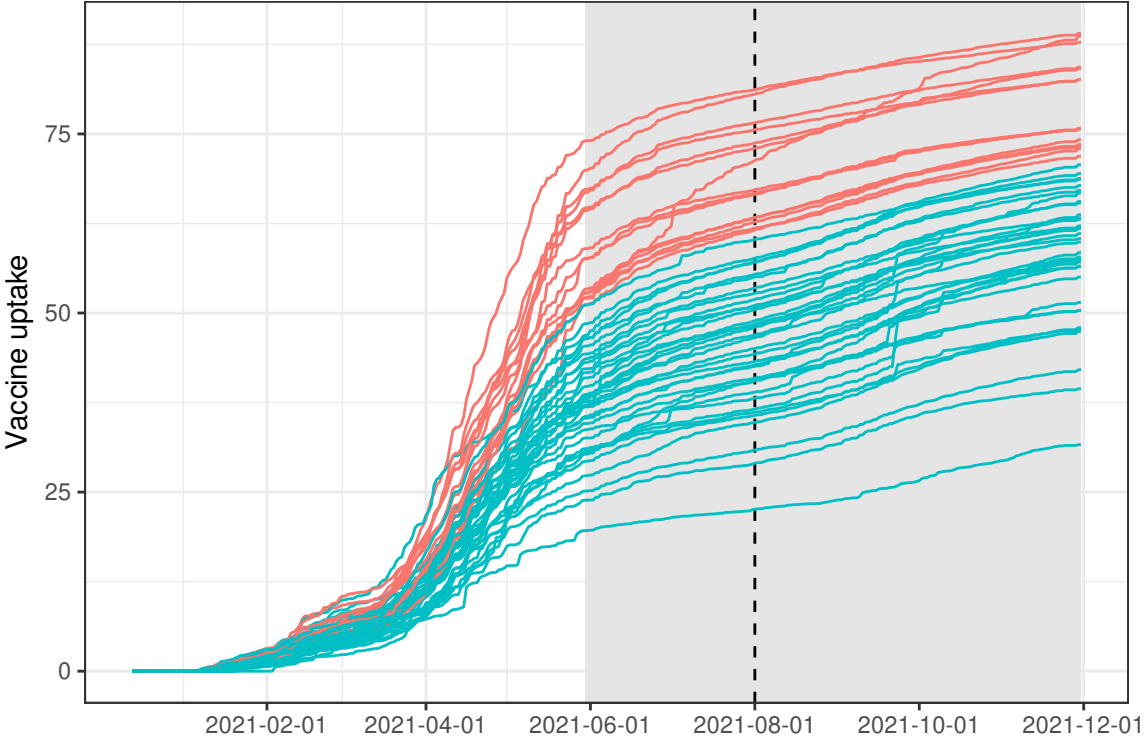

Red lines indicate high-uptake regions while blue lines indicate low-uptake regions. The gray shading indicates a period of consistency in the high/low definition.

Figure S3: Per-capita COVID-19 mortality among Californians 18–65 years of age, by occupational sector and regions of low or high vaccine uptake, March through November 2021, using the alternate definition of high/low regions.

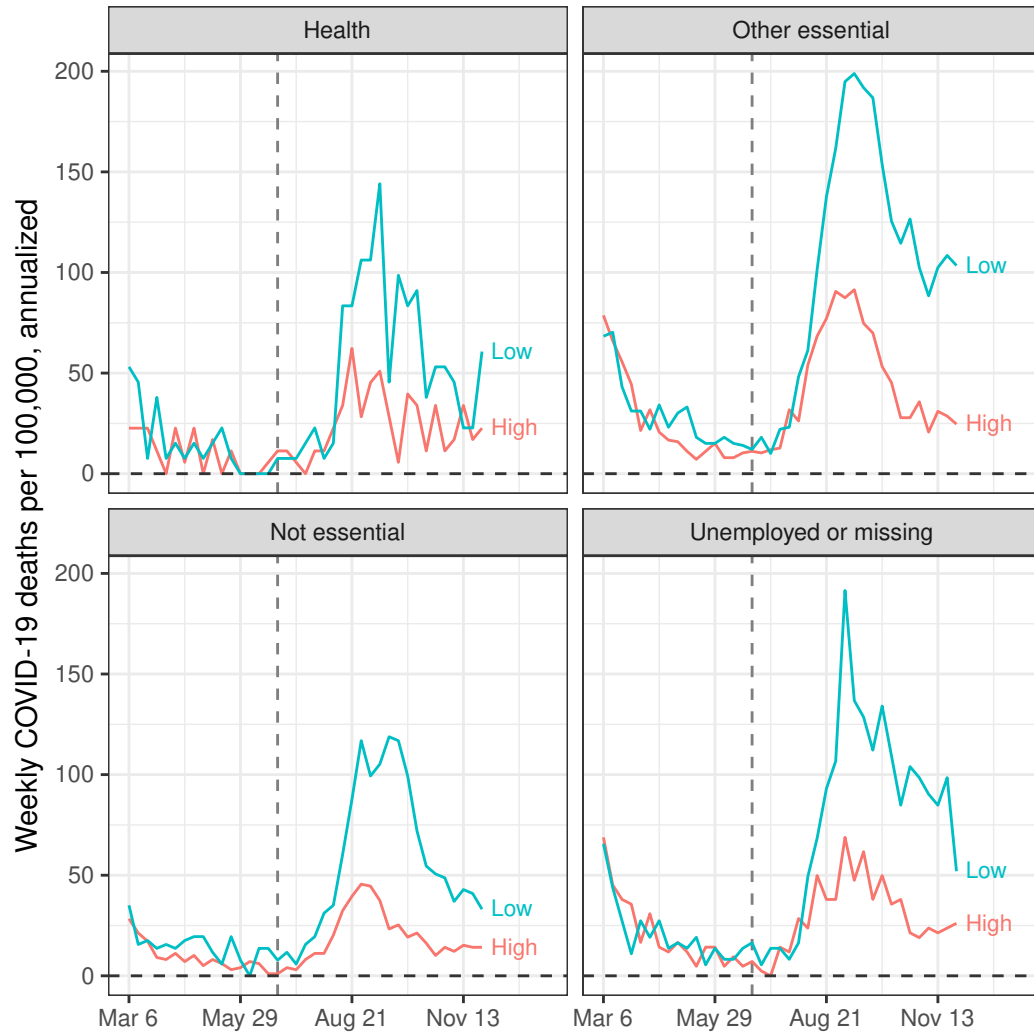

Table S4: Per-capita COVID-19 mortality among Californians 18–65 years of age, by occupational sector and sex, March 2020 through November 2021.

|                          | Female | Male  |
|--------------------------|--------|-------|
| Agriculture              | 60.4   | 168.4 |
| Emergency                | 48.1   | 97.8  |
| Facilities               | 45.8   | 115.2 |
| Government/community     | 33.8   | 54.7  |
| Health                   | 33.8   | 49.2  |
| Manufacturing            | 54.2   | 124.7 |
| Restaurant               | 29.2   | 76.4  |
| Retail                   | 26.3   | 69.1  |
| Transportation/logistics | 42.3   | 123.4 |
| Not essential            | 21.3   | 34.1  |
| Unemployed/missing       | 60.4   | 52.7  |
